# Supplementary material
Source: Springer Nature journal article supplement (https://www.springermedizin.de/resource/supplementary/12935_2010_255_MOESM3_ESM.pdf/9540156)

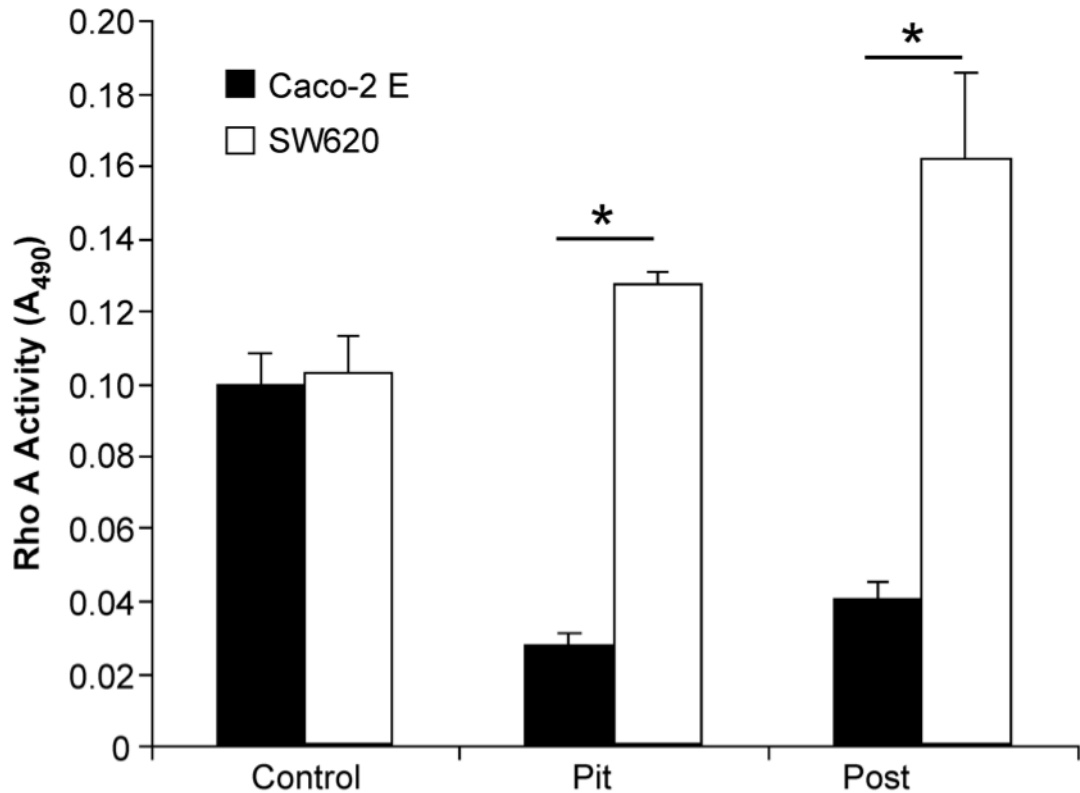

Supplement: MOESM3 [file 9540156]
